# Supplementary material
Source: Springer Nature journal article supplement (https://www.springermedizin.de/resource/supplementary/12889_2007_1115_MOESM1_ESM.pdf/9502484)

## Girls

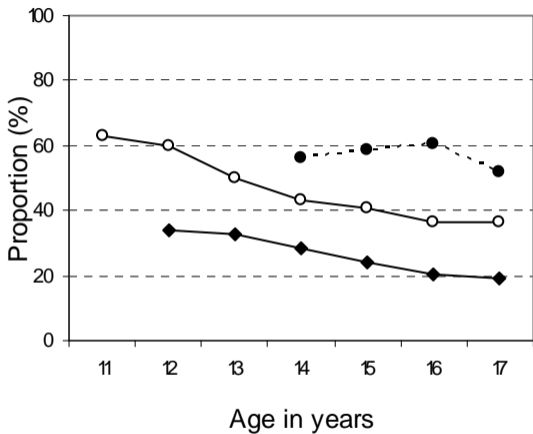

## Boys

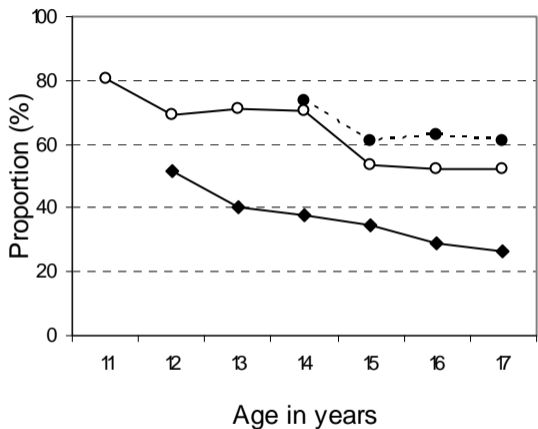

---●--- FSM —○— Tonga —◆— Vanuatu

Supplement: MOESM1 [file 9502484]
